# Supplementary material for: Growth, Photosynthesis and Yield Responses of Common Wheat to Foliar Application of Methylobacterium symbioticum under Decreasing Chemical Nitrogen Fertilization
Source: Preprints.org preprint supplement (doi:10.20944/preprints202408.0878.v1), 2024-08-13
Supplement: Supplementary file 1 [file supplementary]

# SUPPLEMENTARY MATERIALS

Table S1. ANOVA results for SPAD, NDVI, shoot characteristics, photosynthetic parameters, root attributes, yield components, and nutrient contents, showing main effects (Fertilization (F), Bacteria (B)) and their interaction (Fertilization × Bacteria (F × B)). Note: Significance at p ≤ 0.05 (*), p ≤ 0.01 (**), p ≤ 0.001 (***), ns (not significant).

| Treatment | SPAD  (6 May) | SPAD  (13 May) | SPAD  (11 June) | NDVI  (29 May) | NDVI  (11 June) | NDVI  (18 June) |
| --- | --- | --- | --- | --- | --- | --- |
| Fertilization (F) | *** | *** | *** | ns | ns | ns |
| Bacteria (B) | ns | ns | ns | ns | * | ns |
| F × B | ** | ** | ns | ns | ns | ns |

| Treatment | Plant height (cm) | Uppermost internode length (cm) | LAI  (m2 m-2) | LAI/CAI | Shoot DW (g m-2) | Leaf-to-Culm DW Ratio |
| --- | --- | --- | --- | --- | --- | --- |
| Fertilization (F) | ns | ns | ns | ns | ns | * |
| Bacteria (B) | * | ns | ns | ns | ns | ns |
| F × B | *** | ns | ns | ns | ns | ns |

| Treatment | CO2 assimilation rate (µmol m-2s-1) | Stomatal conductance  (mol m-2s-1) | Transpiration rate (mmol m-2 s-1) | PSII efficiency  (Fv'/Fm') |
| --- | --- | --- | --- | --- |
| Fertilization (F) | ns | ns | *** | ns |
| Bacteria (B) | ns | ** | *** | ** |
| F × B | ns | ** | *** | ** |

| Treatment | RLD  (cm cm-3) | | | RAD (  cm2 cm-3) | | | Diameter  (µm) | | | Root dry weight  (mg cm-3) | | |
| --- | --- | --- | --- | --- | --- | --- | --- | --- | --- | --- | --- | --- |
| 0-50 | 50-100 | 0-100 | 0-50 | 50-100 | 0-100 | 0-50 | 50-100 | 0-100 | 0-50 | 50-100 | 0-100 |
| Fertilization (F) | ns | ns | ns | ns | ns | ns | ns | *** | *** | ns | ns | ns |
| Bacteria (B) | ns | * | ns | ns | ns | ns | ns | *** | * | ns | ns | ns |
| F × B | ns | ns | ns | ns | ns | ns | ns | ns | ns | ns | ns | ns |

| Treatment | Grain yield  (g m-2) | HI (%) | TSW (G) | Testing weight  (kg hL-1) | GPC  (% DW) | Gliadins (mg/g) | Glutenins (mg/g) | GLI/  GLU | HMW/  LMW |
| --- | --- | --- | --- | --- | --- | --- | --- | --- | --- |
| Fertilization (F) | ns | ns | ns | ns | ns | ns | ns | ns | * |
| Bacteria (B) | ns | ns | ns | ns | ns | *** | * | *** | ns |
| F × B | ns | ns | ns | ns | ns | ns | ns | ns | ns |

| Treatment | | N  (% DM) | Ca (mg kg-1 DM) | K  (mg kg-1 DM) | Mg  (mg  kg-1 DM) | P  (mg kg-1 DM) | Na (mg kg-1 DM) | Fe  (mg kg-1 DM) | Mn  (mg  kg-1 DM) | Zn  (mg  kg-1 DM) |
| --- | --- | --- | --- | --- | --- | --- | --- | --- | --- | --- |
| Fertilization (F) | Grain | ns | ** | ** | ** | ** | ns | ns | *** | ns |
| Straw | ns | ns | ns | ns | * | ns | ns | ns | ns |
| Bacteria (B) | Grain | ns | ns | ns | ns | * | ns | * | *** | ns |
| Straw | ns | ns | ns | ns | * | ns | ns | * | ns |
| F × B | Grain | ns | ns | ns | ns | ns | ns | ns | *** | ns |
| Straw | ns | ns | ns | ns | ns | ns | ns | * | ns |

Figure S1. Monthly mean temperatures and precipitations during the wheat growth cycle (2022-2023), compared with the historical average of the last decade 2012-2022 (Legnago-Vangadizza, Verona, ARPAV station).

Figure S2. ESEM micrographs of soft wheat leaf surface in control (non-inoculated) (A, B, C) and inoculated (+BACT) (D, E, F) in 14-day-old wheat seedlings. Note bacteria colonization on the right side only.

Figure S3. Qualitative test for 1-aminocyclopropane-1-carboxylic acid (ACC) deaminase activity. **A)** DF minimal medium without any nitrogen source; **B)** DF minimal medium with ACC as a unique nitrogen source. **1.** *Methylobacterium symbioticum* SB23; **2.** Negative control: *Bosea robiniae* (Bertola et al., 2019);**3.** Positive control: *Pseudomonas umsongensis* (Bertola et al., 2019). Note colonization of *Methylobacterium symbioticum* SB23 and *Pseudomonas umsongensis* (coloured bands) when only ACC was present in the growing medium.

Figure S4. Model lines of some photosynthetic parameters: stomatal conductance (gsw), transpiration rate (Emm) and photosynthetic efficiency (Fv'/Fm') (mean; n =3) in wheat plants under 100%N, 100%N + bact, 75%N and 75%N + bact treatments, at different photosynthetic photon flux density (PPFD). Letters: statistical comparison among treatments (Tukey test, P ≤ 0.05).

Table S2. Root growth parameters: root length density (RLD), root area density (RAD), root diameter and root dry weight (mean ± S.E.; n = 3) in wheat plants under 100%N, 100%N + bact, 75%N and 75%N + bact treatments in various soil layers. In brackets: % variation vs. reference treatment 100%N. Letters: statistical comparison among treatments (Tukey test, P ≤ 0.05).

| Soil layer | Treatment | Root Length Density (RLD) | | Root Area Density (RAD) | | Root Diameter | | Root DW | |
| --- | --- | --- | --- | --- | --- | --- | --- | --- | --- |
| cm |  | cm cm-3 | %var/C | cm2 cm-3 | %var/C | µm | %var/C | mg cm-3 | %var/C |
| 0-100 | 100%N | 2.79 ± 0.51 | a | 1.20 ± 0.18 | a | 24.55 ± 1.19 | a | 0.159 ± 0.010 | a |
| 100%N + bact | 2.79 ± 0.53 | a (=) | 1.17 ± 0.19 | a (-2%) | 27.05 ± 1.76 | a (+10%) | 0.179 ± 0.004 | a (+13%) |
| 75%N | 3.17 ± 0.52 | a (+13%) | 1.27 ± 0.19 | a (+6%) | 21.57 ± 0.70 | b (-12%) | 0.201 ± 0.014 | a (+26%) |
| 75%N + bact | 2.87 ± 0.51 | a (+3%) | 1.16 ± 0.20 | a (-3%) | 22.74 ± 0.91 | ab (-7%) | 0.187 ± 0.026 | a (+17%) |
| 0-50 | 100%N | 4.37 ± 0.83 | a | 1.76 ± 0.30 | a | 22.56 ± 1.61 | a | 0.253 ± 0.213 | a |
| 100%N + bact | 4.80 ± 0.76 | a (+10%) | 1.88 ± 0.28 | a (+7%) | 21.73 ± 1.48 | a (-4%) | 0.296 ± 0.006 | a (+17%) |
| 75%N | 5.20 ± 0.71 | a (+19%) | 2.04 ± 0.26 | a (+16%) | 20.86 ± 1.05 | a (-8%) | 0.338 ± 0.030 | a (+34%) |
| 75%N + bact | 4.76 ± 0.74 | a (+9%) | 1.87 ± 0.29 | a (+6%) | 20.50 ± 0.87 | a (-9%) | 0.310 ± 0.046 | a (+23%) |
| 50-100 | 100%N | 1.21 ± 0.13 | a | 0.63 ± 0.07 | a | 26.55 ± 1.65 | a | 0.066 ± 0.008 | a |
| 100%N + bact | 0.77 ± 0.08 | b (-36%) | 0.47 ± 0.04 | a (-26%) | 32.36 ± 2.57 | a (+22%) | 0.062 ± 0.005 | a (-5%) |
| 75%N | 1.13 ± 0.09 | ab (-7%) | 0.49 ± 0.03 | a (-23%) | 22.29 ± 0.90 | a (-16%) | 0.062 ± 0.006 | a (-5%) |
| 75%N + bact | 0.97 ± 0.13 | ab (-20%) | 0.46 ± 0.05 | a (-28%) | 25.00 ± 1.39 | a (-6%) | 0.064 ± 0.008 | a (-3%) |

Table S3. Rheological properties of wheat dough: strength (W), tenacity-to-extensibility ratio (P/L index), protein degradation index (PDI) and stability (n = 1, derived from 3 replicates/plots) of dough from grains of wheat plants under 100%N, 100%N + bact, 75%N and 75%N + bact treatments. On the right the % variation vs. reference treatment 100%N.

| Treatment | Dough strength  (W) | | Tenacity-to-Estensibility Ratio  (P/L) | | Protein Degradation Index  (PDI) | | Stability | |
| --- | --- | --- | --- | --- | --- | --- | --- | --- |
| 10-4 J | %var/C |  | %var/C | % | %var/C | min. | %var/C |
| 100%N | 362 |  | 0.65 |  | 37 |  | 6.8 |  |
| 100%N + bact | 322 | -11% | 0.63 | -3% | 20 | -45% | 8 | +18% |
| 75%N | 298 | -18% | 0.66 | +2% | 33 | -12% | 7.8 | +15% |
| 75%N + bact | 350 | -3% | 0.69 | +6% | 31 | -17% | 8.4 | +24% |

Table S4. Macro and micro-nutrient content in grain and straw (mean ± S.E.; n = 3) of wheat plants under 100%N, 100%N + bact, 75%N and 75%N + bact treatments. Letters: statistical comparison among treatments (Tukey test, P ≤ 0.05).

| Plant tissue | Treatment | N | | Ca | | | K | | Mg | | P | | Na | | | Fe | | Mn | | | Zn | | |
| --- | --- | --- | --- | --- | --- | --- | --- | --- | --- | --- | --- | --- | --- | --- | --- | --- | --- | --- | --- | --- | --- | --- | --- |
| % DM |  | | mg kg-1 DM |  | mg kg-1 DM |  | mg kg-1 DM |  | mg kg-1 DM |  | mg kg-1 DM |  | mg kg-1 DM | |  | | mg kg-1 DM |  | | mg kg-1 DM |  |
| Grain | 100%N | 2.23 ± 0.009 | a | | 521.2 ± 16.2 | a | 5,330.2 ± 44.3 | a | 1,544.8 ± 51.3 | a | 4,619.8 ± 75.4 | a | 115.1 ± 4.6 | a | 45.4 ± 2.4 | | a | | 37.7 ± 1.2 | a | | 38.1 ± 1.8 | a |
| 100%N + bact | 2.29 ± 0.032 | a | | 511.1 ± 10.4 | ab | 5,188.8 ± 69.7 | ab | 1,549.2± 22.6 | a | 4,368.4 ± 63.1 | a | 115.1 ± 2.3 | a | 42.4 ± 0.6 | | ab | | 34.5 ± 0.7 | a | | 40.5 ± 0.8 | a |
| 75%N | 2.22 ± 0.037 | a | | 464.1 ± 18.4 | ab | 5,006.5 ± 93.5 | ab | 1,397.3 ± 24.1 | ab | 4,129.9 ± 81.5 | ab | 122.4 ±4.8 | a | 43.6 ± 2.1 | | ab | | 37.4 ± 0.7 | a | | 40.4 ± 3.0 | a |
| 75%N + bact | 2.23 ± 0.027 | a | | 440.8 ± 18.5 | b | 4,837.3± 152.6 | b | 1,277.9 ± 60.4 | b | 3,775.4 ± 208.4 | b | 108.0 ± 4.1 | a | 36.0 ± 1.7 | | b | | 25.3 ± 0.5 | b | | 35.3 ± 2.1 | a |
| Straw | 100%N | 0.78 ± 0.092 | a | | 4,925.1 ± 435.9 | a | 22,672.6 ± 1717.9 | a | 1,568.0 ± 139.7 | a | 1,319.4 ± 36.2 | a | 197.0 ± 12.0 | a | 108.3 ± 19.7 | | a | | 23.9 ± 2.4 | ab | | 27.4 ± 3.7 | a |
| 100%N + bact | 0.91 ± 0.103 | a | | 4,759.5 ± 372.1 | a | 20,599.0 ± 2736.7 | a | 1,579.1 ± 121.0 | a | 1,155.0 ± 52.2 | ab | 195.0 ± 19.7 | a | 73.6 ± 5.1 | | a | | 23.7 ± 2.7 | ab | | 33.1 ± 5.0 | a |
| 75%N | 0.83 ± 0.067 | a | | 4,523.0 ± 177.3 | a | 23,821.6 ± 1461.2 | a | 1,499.4 ± 52.6 | a | 1,126.6 ± 99.0 | ab | 176.4 ± 5.1 | a | 77.2 ± 3.4 | | a | | 27.2 ± 1.5 | a | | 25.1 ±1.2 | a |
| 75%N + bact | 0.85 ± 0.041 | a | | 4,804.4 ± 306.2 | a | 18,190.0 ± 808.1 | a | 1,504.0 ± 88.1 | a | 966.1 ± 56.7 | b | 181.5 ± 10.1 | a | 88.8 ± 5.8 | | a | | 17.6 ± 0.5 | b | | 36.7 ± 6.0 | a |
